# Supplementary material for: Altered Functional Connectivity during Mild Transient Respiratory Impairment Induced by a Resistive Load
Source: MDPI journal article supplement (doi:10.3390/jcm13092556), 2024-04-26
Supplement: s1 [file s1]

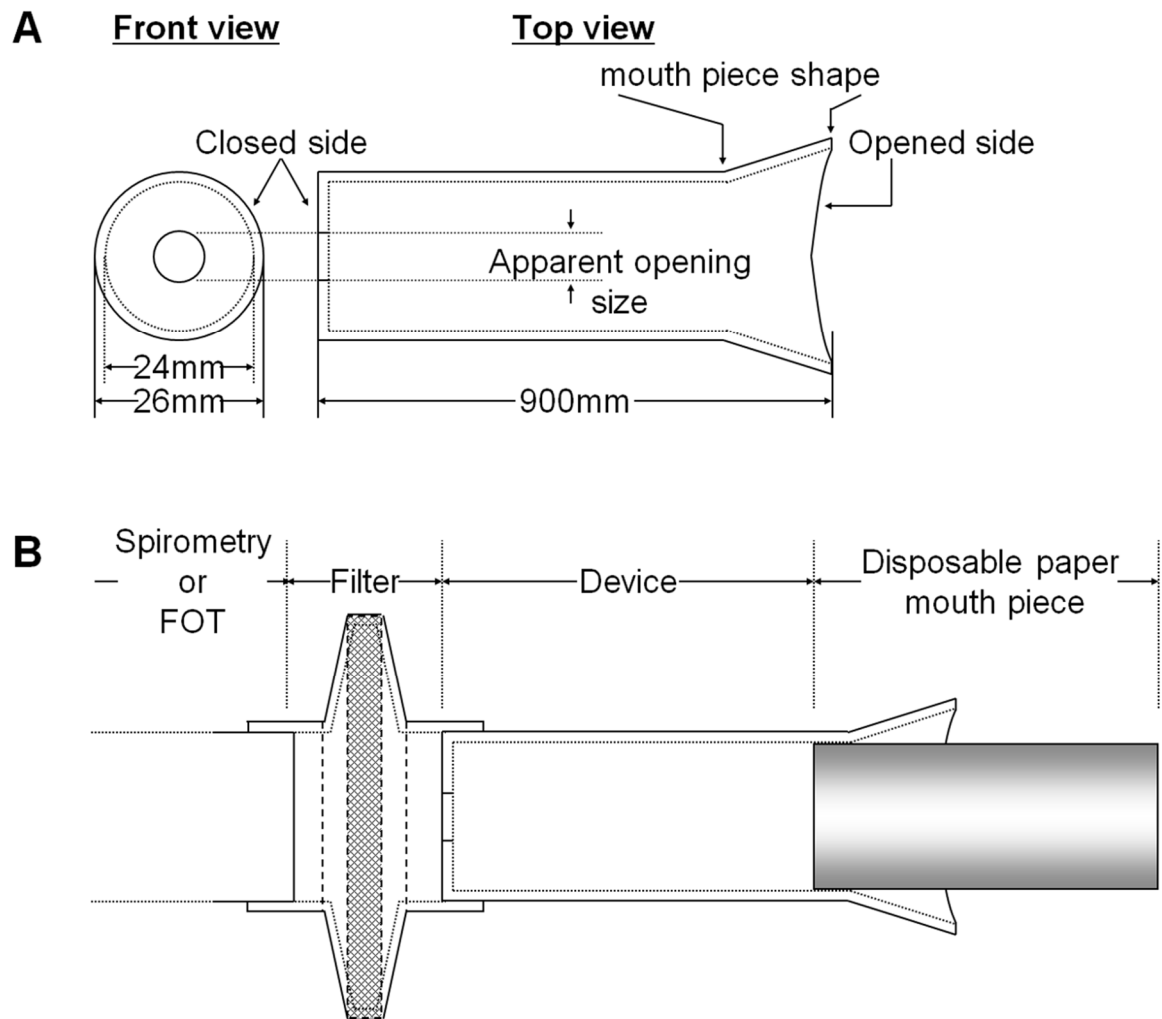

Figure S1: The structure of the device and the results from the preliminary study using the devices in healthy volunteers.

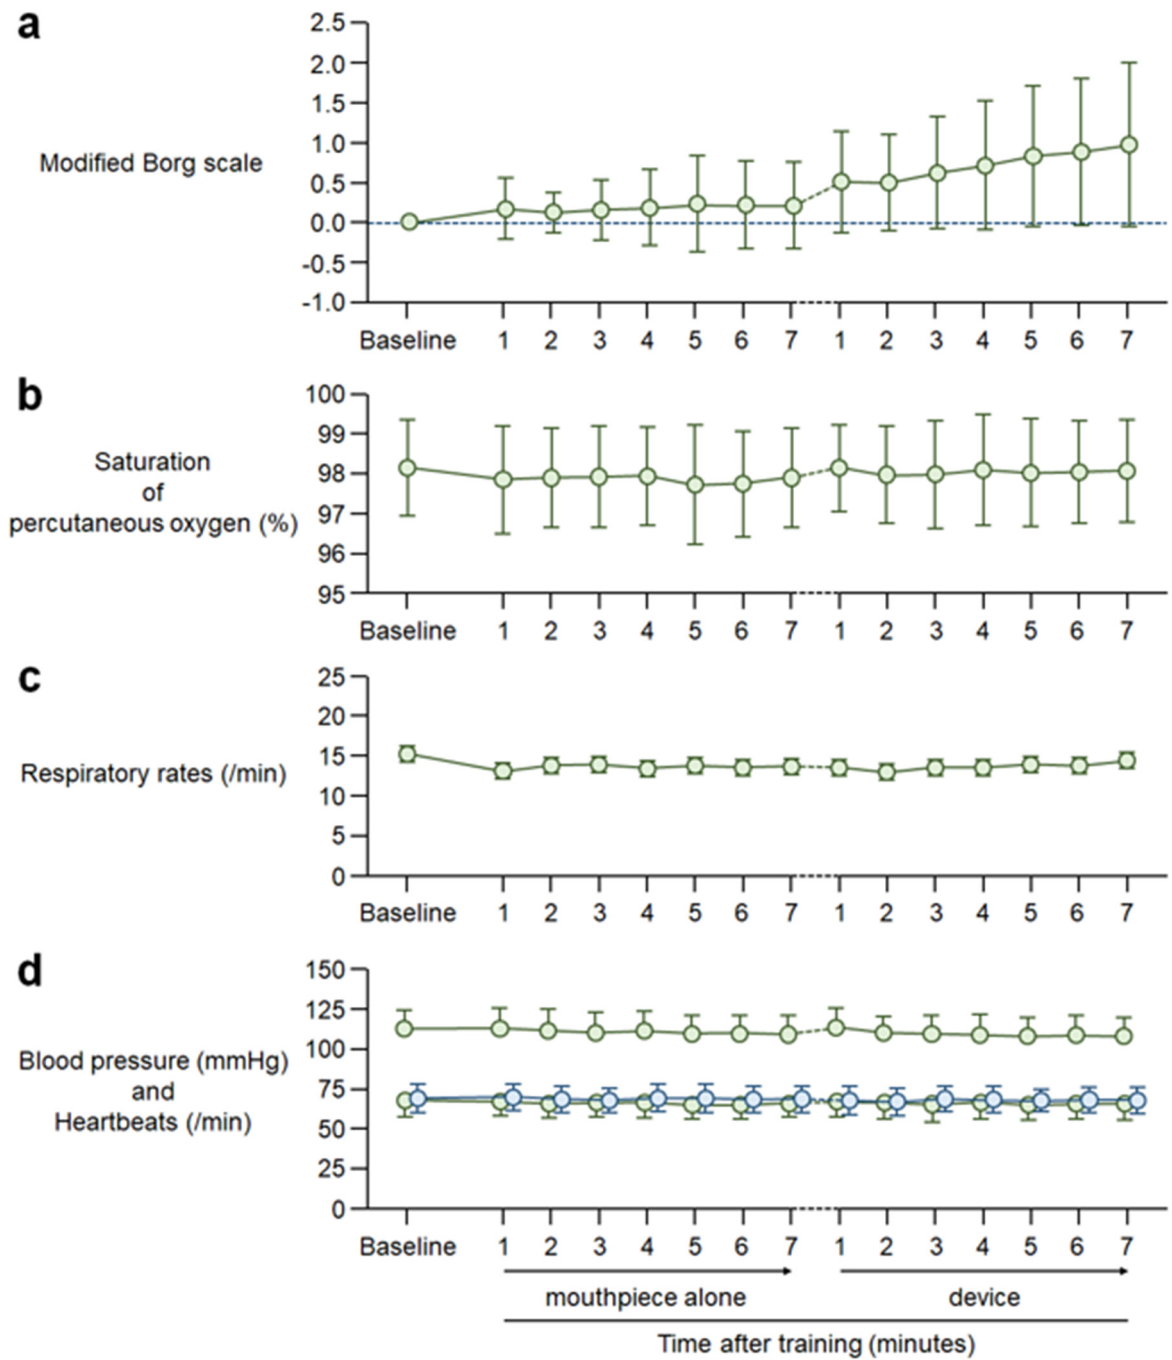

Figure S2: Changes in modified Borg scale and vital signs during respiratory training between normal breathing (mouthpiece alone) and resistive load (device).
